# Supplementary material for: Predicting forest insect flight activity: A Bayesian network approach
Source: PLOS journal article supplement (doi:10.1371/journal.pone.0183464), 2017-09-27
Supplement: S1 (10.1371/journal.pone.0183464.s001) [file journal.pone.0183464.s001]

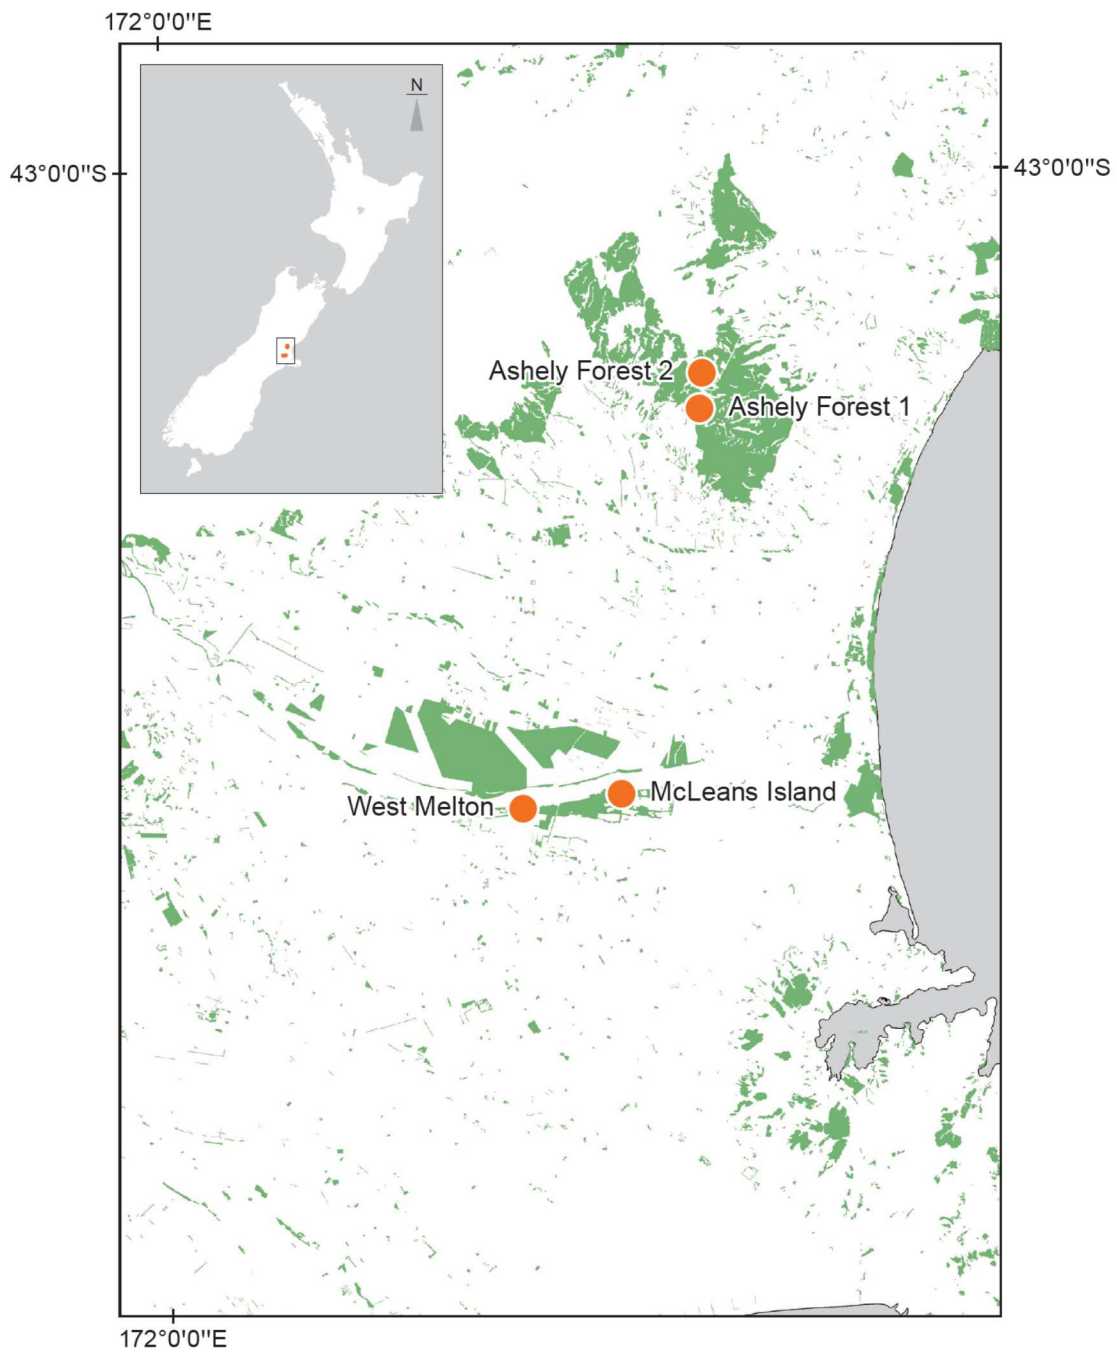

Figure S1. Location of study sites in Canterbury, New Zealand. Green shading indicates areas of exotic plantation forests.
