# Supplementary material for: Predicting forest insect flight activity: A Bayesian network approach
Source: PLOS journal article supplement (doi:10.1371/journal.pone.0183464), 2017-09-27
Supplement: S2 (10.1371/journal.pone.0183464.s002) [file journal.pone.0183464.s002]

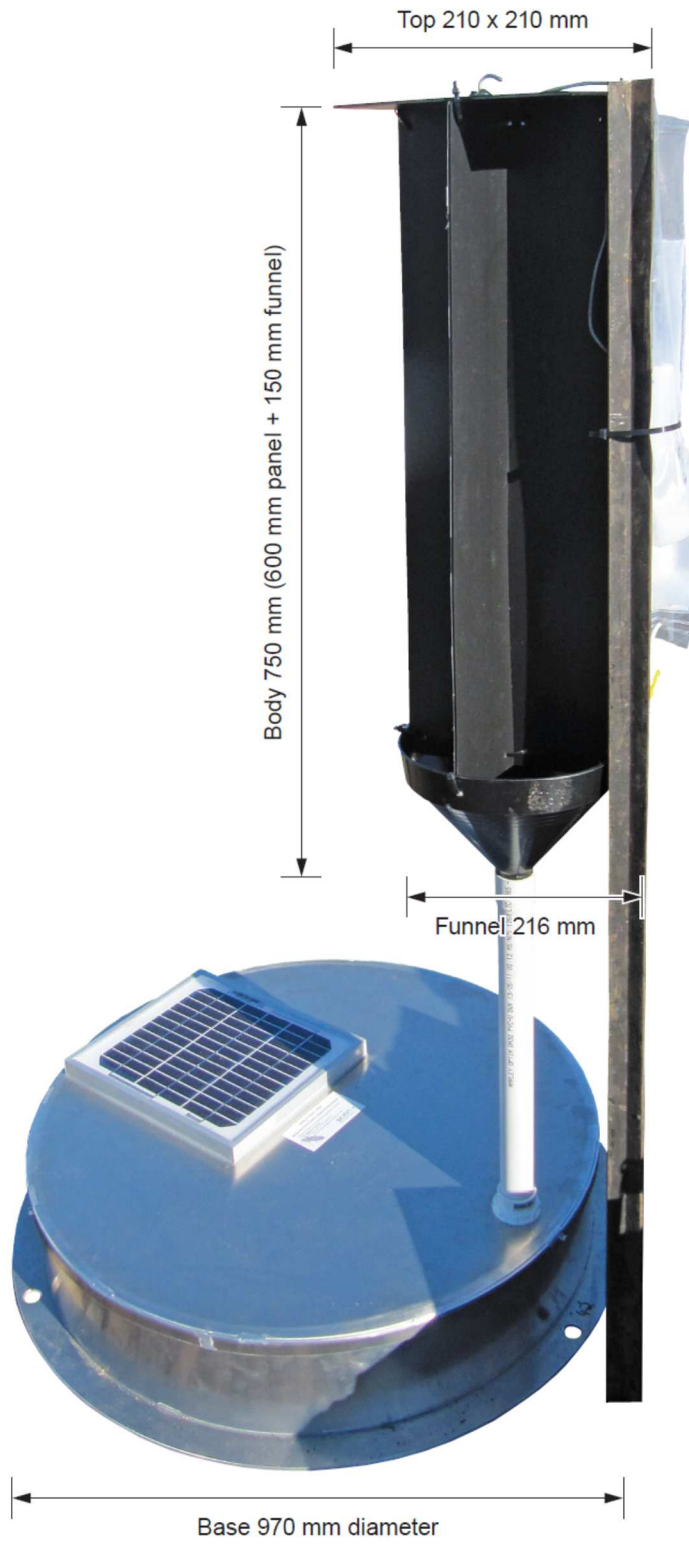

Figure S2. Separator trap used in study
