# Supplementary material for: Predicting forest insect flight activity: A Bayesian network approach
Source: PLOS journal article supplement (doi:10.1371/journal.pone.0183464), 2017-09-27
Supplement: S4 (10.1371/journal.pone.0183464.s004) [file journal.pone.0183464.s004]

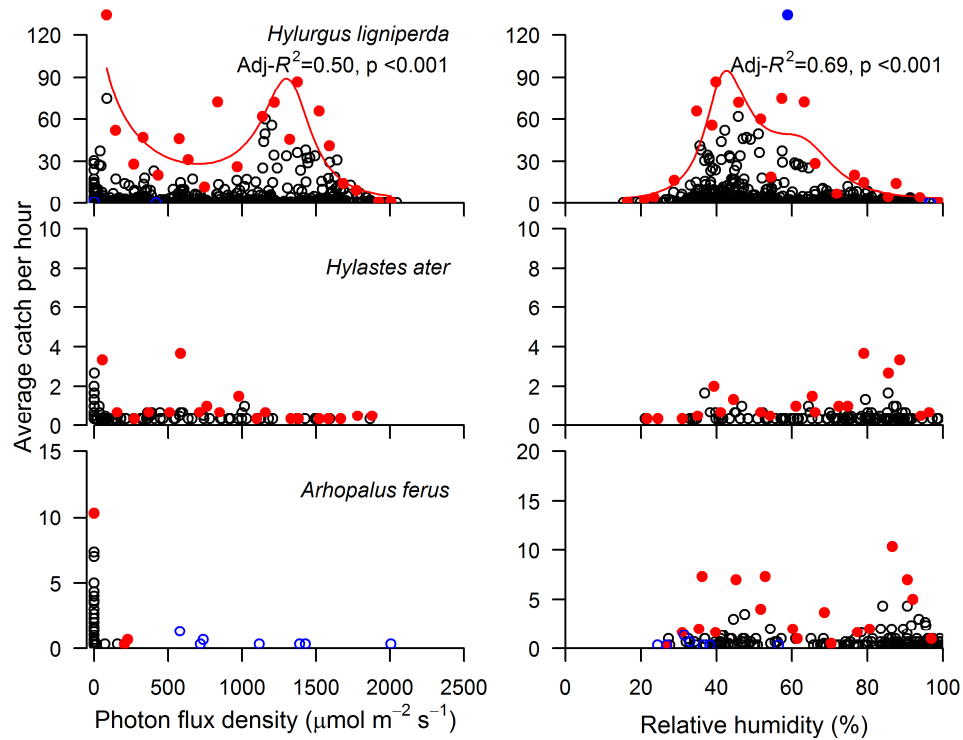

**Fig S4. Average catch per trap per hour as a function of photon flux density and relative humidity.**

Red symbols indicate the maximum trap catch per interval, solid blue symbols represent model outliers with a Cook's distance  $< 1$ , and open blue symbols indicate suspect trap catch removed from analysis (see results). Model predictions are only shown when a significant relationship was present between the predictor and response variable. The adjusted  $R^2$  provides an estimate of the variance explained by the non-linear curve fitting and are only provided when a non-linear response is identified.
