# Supplementary material for: Predicting forest insect flight activity: A Bayesian network approach
Source: PLOS journal article supplement (doi:10.1371/journal.pone.0183464), 2017-09-27
Supplement: S5 (10.1371/journal.pone.0183464.s005) [file journal.pone.0183464.s005]

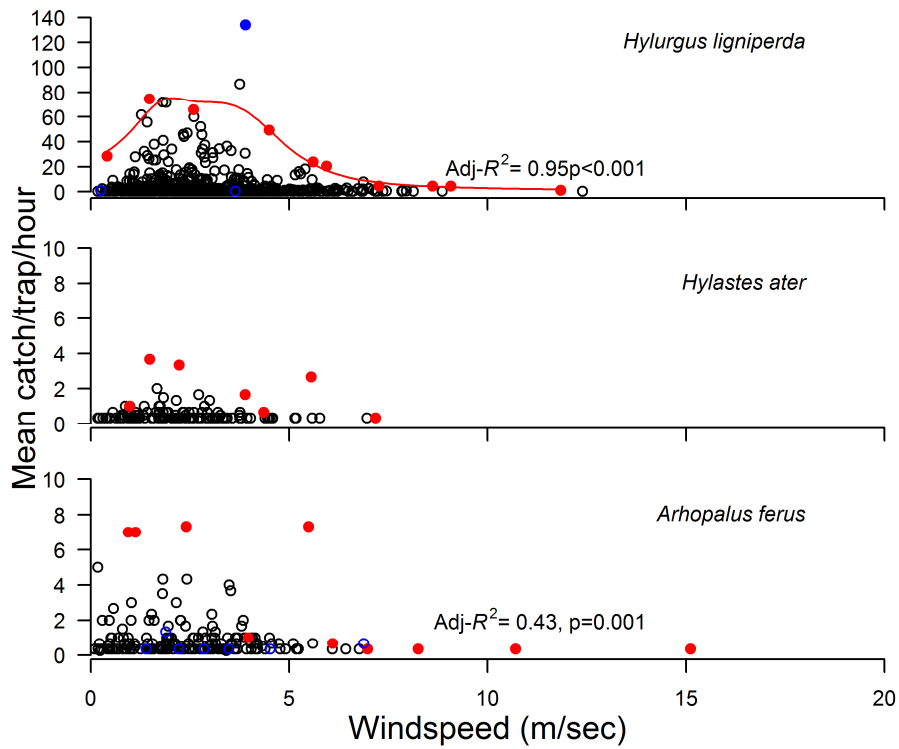

**Fig S5. Average catch per trap per hour as a function of wind speed.**

Red symbols indicate the maximum trap catch per interval, solid blue symbols represent model outliers with a Cook's distance < 1, and open blue symbols indicate suspect trap catch removed from analysis (see results). Model predictions are only shown when a significant relationship was present between the predictor and response variable. The adjusted  $R^2$  provides an estimate of the variance explained by the non-linear curve fitting and are only provided when a non-linear response is identified.
