# Supplementary material for: Predicting forest insect flight activity: A Bayesian network approach
Source: PLOS journal article supplement (doi:10.1371/journal.pone.0183464), 2017-09-27
Supplement: S6 (10.1371/journal.pone.0183464.s006) [file journal.pone.0183464.s006]

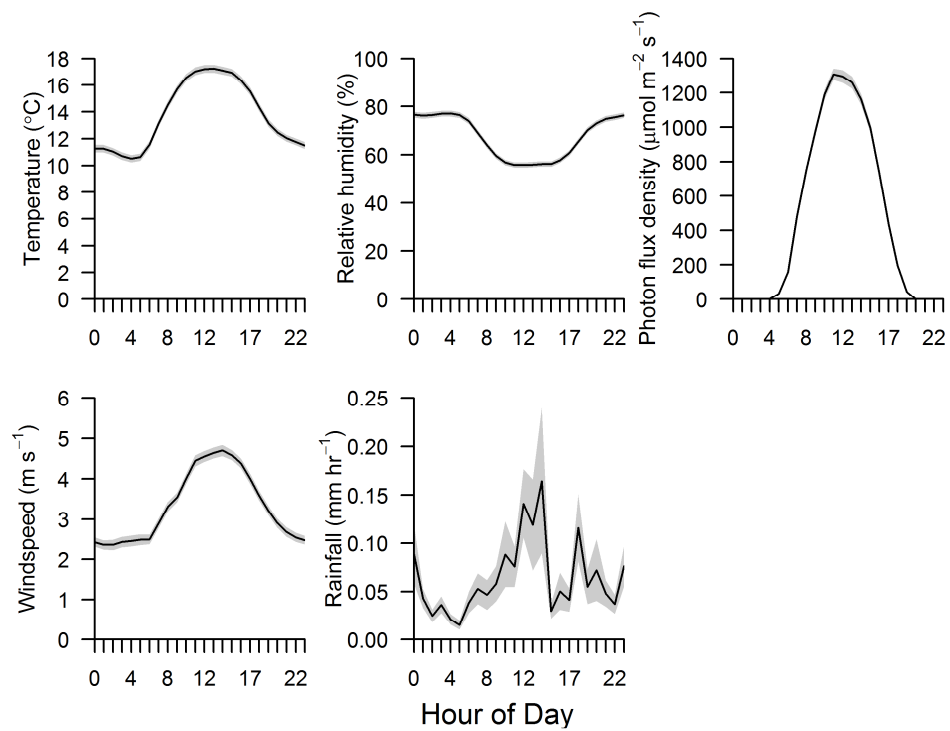

Figure S6. Mean hourly meteorological conditions as a function of the time of day averaged across all sites. The grey polygon defines the standard error of the mean for each hourly measurement.
