# Supplementary material for: Predicting forest insect flight activity: A Bayesian network approach
Source: PLOS journal article supplement (doi:10.1371/journal.pone.0183464), 2017-09-27
Supplement: S7 (10.1371/journal.pone.0183464.s007) [file journal.pone.0183464.s007]

**Table S1: Location of individual traps in the four study sites**

Two sites were established in Ashley Forest, the first on McGibbons Rd in a recently clear-felled stand with a predominant southeast aspect at 300 m elevation. The second site was on Mt Grey Rd also in a recently clear-felled stand, but with a predominantly eastern aspect at 381m elevation. The third site was on a flat, recently clear-felled site in the West Melton Forest Rd at 104 m elevation. The fourth site was on a flat, recently clear-felled site in McLeans Forest at 59 m elevation. As recent clearfells all sites had no limited to no forest structure, i.e., newly planted sites with 0.3 m seedlings or young trees up to 0.7 m.

| Forest          | Location     | Forest Compartment | Harvest Year | NZTM East | NZTM North |
|-----------------|--------------|--------------------|--------------|-----------|------------|
| Ashley Forest   | McGibbons Rd | 29                 | 2012         | 1562257   | 5219568    |
| Ashley Forest   | McGibbons Rd | 29                 | 2012         | 1562274   | 5219605    |
| Ashley Forest   | McGibbons Rd | 29                 | 2012         | 1562216   | 5219563    |
| Ashley Forest   | McGibbons Rd | 29                 | 2012         | 1562232   | 5219536    |
| Ashley Forest   | Mt Grey Rd   | 62                 | 2012         | 1562429   | 5222459    |
| Ashley Forest   | Mt Grey Rd   | 62                 | 2012         | 1562427   | 5222418    |
| Ashley Forest   | Mt Grey Rd   | 62                 | 2012         | 1562415   | 5222496    |
| Ashley Forest   | Mt Grey Rd   | 62                 | 2012         | 1562390   | 5222467    |
| West Melton     | Thompsons Rd | 12                 | 2012         | 1547946   | 5187228    |
| West Melton     | Thompsons Rd | 12                 | 2012         | 1547905   | 5187228    |
| West Melton     | Thompsons Rd | 12                 | 2012         | 1547948   | 5187188    |
| West Melton     | Thompsons Rd | 12                 | 2012         | 1547985   | 5187227    |
| McLean's Island | Norton Ave   | 28                 | 2011         | 1555927   | 5188432    |
| McLean's Island | Norton Ave   | 28                 | 2011         | 1555887   | 5188427    |
| McLean's Island | Norton Ave   | 28                 | 2011         | 1555930   | 5188393    |
| McLean's Island | Norton Ave   | 28                 | 2011         | 1555966   | 5188427    |
