# Supplementary material for: Predicting forest insect flight activity: A Bayesian network approach
Source: PLOS journal article supplement (doi:10.1371/journal.pone.0183464), 2017-09-27
Supplement: S8 (10.1371/journal.pone.0183464.s008) [file journal.pone.0183464.s008]

Table S2. Title and description of nodes used in Bayesian network models of *Hylurgus ligniperda*, *H. ater* and *Arhopalus ferus* flight activity. N/A = the node does not pertain to the species model.

| Node title                                                          | Node description                                                                                                                                                                                                                                                        | States                                           |                                                         |                                                                                 |
|---------------------------------------------------------------------|-------------------------------------------------------------------------------------------------------------------------------------------------------------------------------------------------------------------------------------------------------------------------|--------------------------------------------------|---------------------------------------------------------|---------------------------------------------------------------------------------|
|                                                                     |                                                                                                                                                                                                                                                                         | <i>Hylurgus ligniperda</i>                       | <i>Hylastes ater</i>                                    | <i>Arhopalus ferus</i>                                                          |
| Flight                                                              | The occurrence of flight during that hour.                                                                                                                                                                                                                              | Yes<br>No                                        | Yes<br>No                                               | Yes<br>No                                                                       |
| Day of year                                                         | The day of the year was expressed as a decimal (001-366).<br>Because the sampling occurred across three discontinuous periods we incorporate the day of the year as a measure of the time of year to indicate if there are seasonal differences to the flight activity. | <344<br>≥344                                     | <41<br>≥41                                              | <14<br>>14 to 41<br>>41 to 325<br>≥325                                          |
| Maximum temperature (C)                                             | The maximum temperature recorded during the hour. Measurements during the hour were taken every minute.                                                                                                                                                                 | <12.3<br>>12.3 to 14.6<br>>14.6 to 17.5<br>≥17.5 | <14.0<br>≥14.0                                          | <12.6<br>≥12.6                                                                  |
| Photon flux density (μmol photons m <sup>-2</sup> s <sup>-1</sup> ) | Measure of the average photons in the 400-700nm range per square metre per second during the sampling hour. The average is of observations taken every minute.                                                                                                          | <0.1<br>>0.1 to 565<br>>565 to 1704<br>>1704     | N/A                                                     | <0.23<br>≥0.23                                                                  |
| Rainfall (mm/hr)                                                    | Cumulative rainfall across the sampling hour.                                                                                                                                                                                                                           | <0.1<br>≥0.1                                     | N/A                                                     | N/A                                                                             |
| Relative humidity (%)                                               | The average relative humidity calculated from minute observations during the hour                                                                                                                                                                                       | <82<br>>82 to 93<br>≥93                          | N/A                                                     | N/A                                                                             |
| Temperature range (C)                                               | The range (in °C) between the maximum and minimum temperatures recorded during the sampling hour. Measurements during the hour were taken every minute.                                                                                                                 | <0.91<br>≥0.91                                   | <0.90<br>≥0.90                                          | <1.1<br>≥1.1                                                                    |
| Time since sunrise (mins)                                           | The time in minutes since sunrise as measured from the start of the sampling hour. For example, if sunrise was at 5:50am, the trap hour beginning at 6am would have a value of -10 minutes, however the 5am trap hour would have a value of 50 minutes.                 | <19<br>>19 to 375<br>>375 to 891<br>≥891         | <33<br>>33 to 289<br>>289 to 735<br>>735 to 952<br>≥952 | N/A                                                                             |
| Time since sunset (mins)                                            | The time in minutes since sunset as measured from the start of the sampling hour. For example, if sunset was at 8:30pm, the trap hour beginning at 8pm would have a value of -30 minutes, however the 9pm trap hour would have a value of 30 minutes.                   | <11<br>>11 to 498<br>>498 to 589<br>≥589         | <-47<br>>-47 to 1221<br>≥1221                           | <-20<br>>-20 to 6<br>>6 to 40<br>>40 to 65<br>>65 to 191<br>>191 to 373<br>≥373 |
| Wind speed (m-1s-1)                                                 | Average wind speed during the hour, calculated from minute observations.                                                                                                                                                                                                | <0.9<br>>0.9 to 4.1<br>≥4.1                      | <3.3<br>≥3.3                                            | <4.2<br>≥4.2                                                                    |
